# Supplementary material for: GDI-1 preferably interacts with Rab10 in insulin-stimulated GLUT4 translocation
Source: PubMed Central journal article supplement — Biochem J. 2009 Aug 13;422(Pt 2):229–35. doi: 10.1042/BJ20090624 (PMC2729519; doi:10.1042/bj20090624), 2009-08-13
Supplement: bj4220229add.pdf [file bj4220229add.pdf]

## SUPPLEMENTARY ONLINE DATA

# GDI-1 preferably interacts with Rab10 in insulin-stimulated GLUT4 translocation

Yu CHEN\*†<sup>1</sup>, Yongqiang DENG\*†<sup>1</sup>, Jinzhong ZHANG\*†, Lu YANG\*†, Xiangyang XIE\*† and Tao XU\*<sup>2</sup>

\*National Key Laboratory of Biomacromolecules, Institute of Biophysics, Chinese Academy of Sciences, Beijing, 100101, China, and †Graduate School of the Chinese Academy of Sciences, Beijing, 100864, China

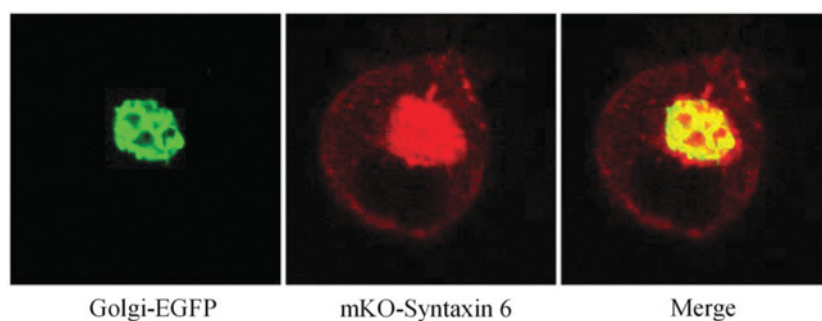

**Figure S1** Localization of Syntaxin 6

3T3-L1 adipocytes were co-transfected with Golgi-EGFP and mKO-Syntaxin 6, and were observed under confocal microscopy.

Received 23 April 2009/25 June 2009; accepted 2 July 2009

Published as BJ Immediate Publication 2 July 2009, doi:10.1042/BJ20090624

<sup>1</sup> These authors contribute equally to this work.

<sup>2</sup> To whom correspondence should be addressed (email xutao@ibp.ac.cn).
